# Supplementary material for: Interaction between glyphosate pesticide and amphiphilic peptides for colorimetric analysis
Source: Royal Society of Chemistry journal article supplement (doi:10.1039/d2na00345g), 2022-01-01
Supplement: d2na00345g1.pdf [file d2na00345g1.pdf]

## Support information

### Interaction between glyphosate pesticide and amphiphilic peptides for colorimetric analysis

Barbara B. Gerbelli,<sup>a,b</sup> Pedro L. O. Filho,<sup>c,d</sup> Bruna Cortez,<sup>b</sup> Pedro T. Sodr ,<sup>b</sup> Mauricio D. Coutinho-Neto,<sup>b</sup> Ian W. Hamley,<sup>a\*</sup> Jani Seitsonen,<sup>e</sup> Wendel A. Alves<sup>b\*</sup>

<sup>a</sup>University of Reading, Department of Chemistry, Reading, United Kingdom.

<sup>b</sup>Universidade Federal do ABC, Centro de Ci ncias Naturais e Humanas, S o Paulo, SP, Brazil.

<sup>c</sup>University of Copenhagen, Niels Bohr Institute, Copenhagen, Denmark.

<sup>d</sup>Universidade de S o Paulo, Instituto de F sica, S o Paulo, SP, Brazil.

<sup>e</sup>Nanomicroscopy Center , Aalto University, Puumiehenkuja 2, FIN-02150 Espoo, Finland

\*Corresponding authors: [i.w.hamley@reading.ac.uk](mailto:i.w.hamley@reading.ac.uk); [wendel.alves@ufabc.edu.br](mailto:wendel.alves@ufabc.edu.br)

## Contents

|                                                                                                                                                                                                                                                                                                                                                                                          |   |
|------------------------------------------------------------------------------------------------------------------------------------------------------------------------------------------------------------------------------------------------------------------------------------------------------------------------------------------------------------------------------------------|---|
| <b>Figure S1.</b> Raw fluoresce data were performed using $3.25 \times 10^{-4}$ to 0.13 wt % peptide in $9 \times 10^{-5}$ wt % pyrene solution to compounds (A) for <b>1</b> and (B) for <b>2</b> . .....                                                                                                                                                                               | 2 |
| <b>Figure S2.</b> Cylinder and bilayer SAXS models were used to analyze the data, where $\delta T$ and $\delta H$ are the thickness of the hydrophobic and hydrophilic region, respectively, whereas $\Delta\rho$ is the scattering length contrast of the hydrophilic region relative to the hydrophobic one, i.e., $\Delta\rho = \delta H\delta T$ . .....                             | 2 |
| <b>Figure S3.</b> (a) Picture of the Elman's test for <b>2</b> in different AcTh concentrations. (b) The absorbance is a function of the wavelength for different AcTh amounts. ....                                                                                                                                                                                                     | 2 |
| <b>Figure S4.:</b> NEB-CI energy profile with 11 images of AcTh breakage into an acetyl proline and thiocholine (Th). Geometries of reactants (left) and product (right) are shown as image inserts. The NEB trajectory was previously optimized using def2-SVP from ma-def2-TZVP stationary points. The NEB approximation to the transition state has an energy of 12.85 kcal/mol. .... | 3 |
| <b>Figure S5.</b> ITC data for molecules <b>1</b> and <b>2</b> in the presence of PNG and the Carbetamide (Carb). ....                                                                                                                                                                                                                                                                   | 3 |
| <b>Figure S6.</b> The kinetic behavior of the absorbance intensity as a function of the time with different lipopeptide amounts of (A) <b>1</b> and (B) <b>2</b> , respectively. ....                                                                                                                                                                                                    | 4 |

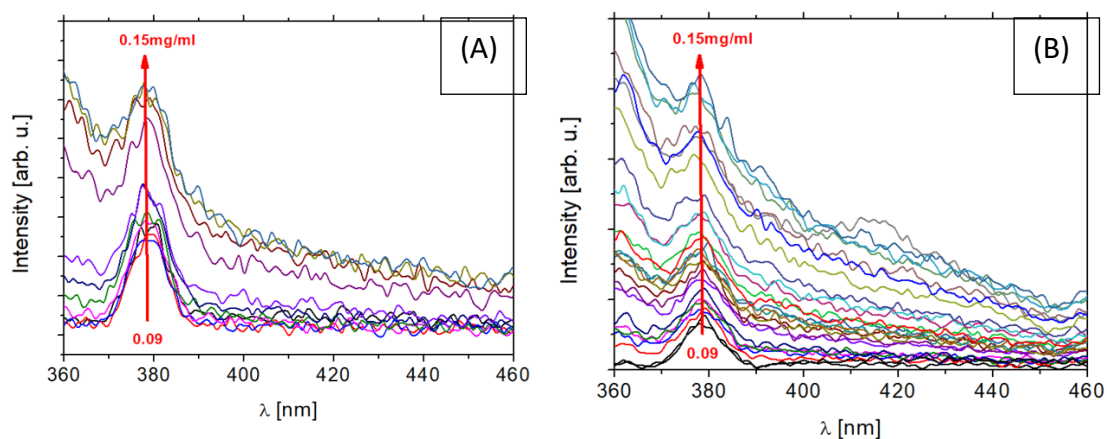

**Figure S1.** Raw fluorescence data were performed using  $3.25 \times 10^{-4}$  to 0.13 wt % peptide in  $9 \times 10^{-5}$  wt % pyrene solution to compounds (A) for **1** and (B) for **2**.

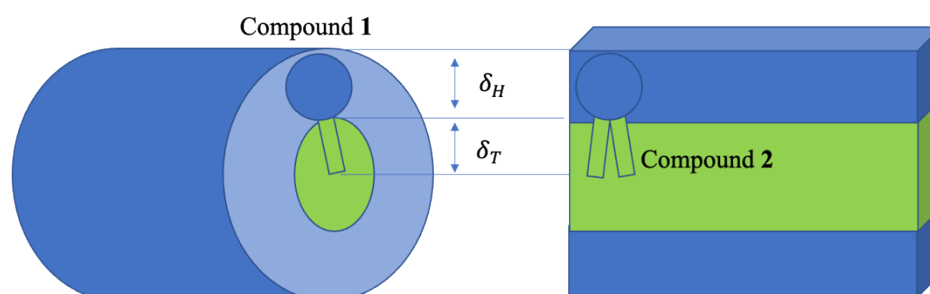

**Figure S2.** Cylinder and bilayer SAXS models were used to analyze the data, where  $\delta_T$  and  $\delta_H$  are the thickness of the hydrophobic and hydrophilic region, respectively, whereas  $\Delta\rho$  is the scattering length contrast of the hydrophilic region relative to the hydrophobic one, i.e.,

$$\Delta\rho = \frac{\delta_H}{\delta_T}.$$
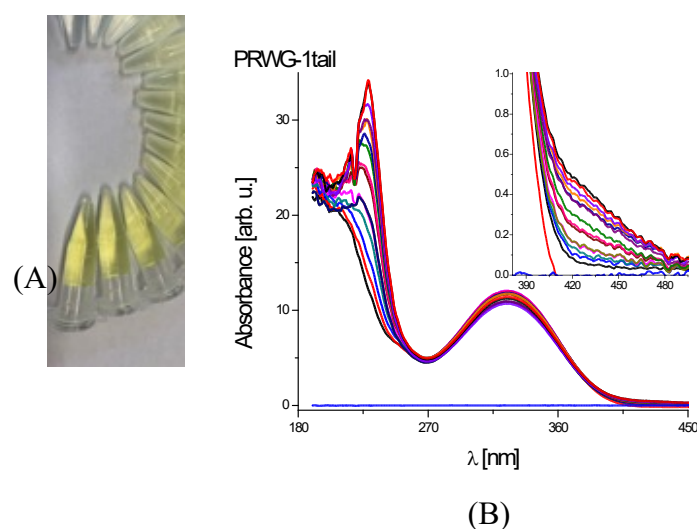

**Figure S3.** (A) Picture of the Elman's test for **2** in different AcTh concentrations. (B) The absorbance is a function of the wavelength for different AcTh amounts.

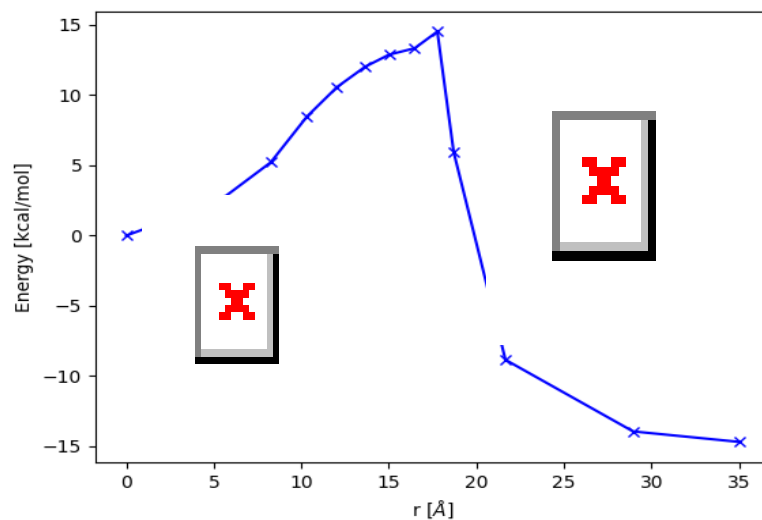

**Figure S4.:** NEB-CI energy profile with 11 images of AcTh breakage into an acetyl proline and thiocholine (Th). Geometries of reactants (left) and product (right) are shown as image inserts. The NEB trajectory was previously optimized using def2-SVP from ma-def2-TZVP stationary points. The NEB approximation to the transition state has an energy of 12.85 kcal/mol.

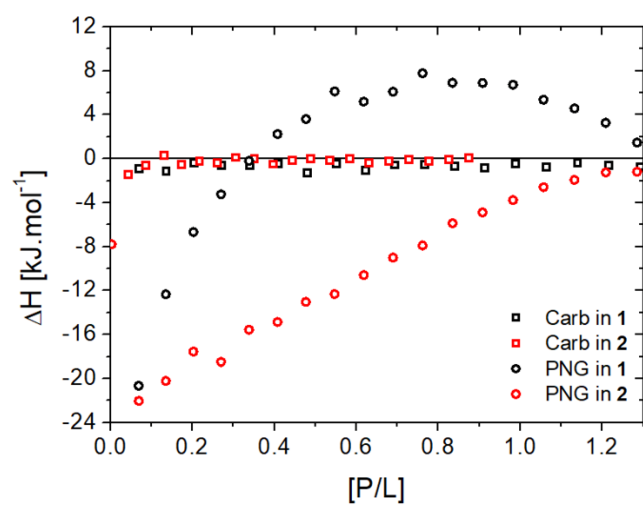

**Figure S5.** ITC data for molecules 1 and 2 in the presence of PNG and the Carbetamide (Carb).

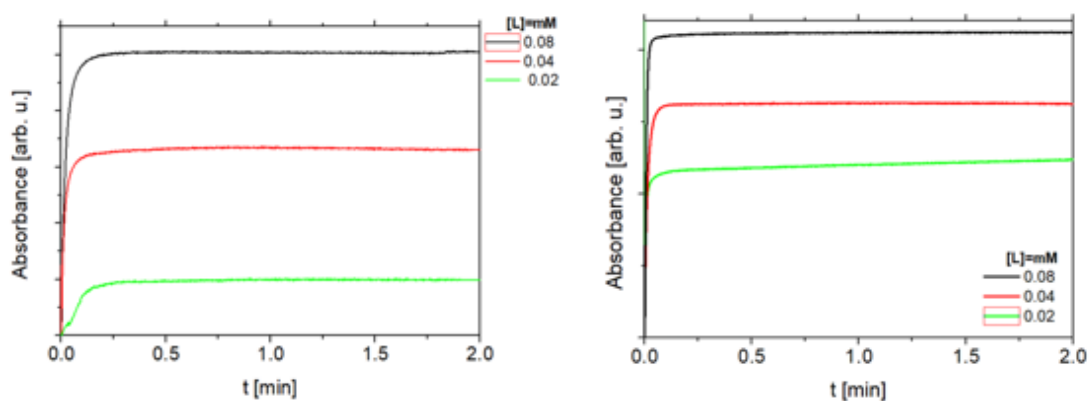

**(A)**

**(B)**

**Figure S6.** The kinetic behavior of the absorbance intensity as a function of the time with different lipopeptide amounts of (A) **1** and (B) **2**, respectively.
